# Supplementary material for: Association between Estimated Glucose Disposal Rate and Impaired Cardiovascular Fitness in Non-diabetic Young Population: A Cross-sectional Study Based on NHANES Database
Source: Research Square preprint supplement (doi:10.21203/rs.3.rs-5609375/v1), 2024-12-24
Supplement: Supplementary file 1 [file 043d729622beefca57b6874b.docx]

**Table S1 Definition of physical activity**

**Table S2 Definition of smoking status**

**Table S3** **The measurement methods of laboratory indicators**

**Table S4 Comprehensive details of the Survival Cohort Study Design for NHANES 1999-2004**

| **Table S1 Definition of physical activity** | |
| --- | --- |
| Level 0 | Little or no regular recreation, sport or physical activity and avoids walking or exertion |
| Level 1 | Little or no regular recreation, sport or physical activity but walks for pleasure and occasionally exercises |
| Level 2 | participating regularly in recreation or work requiring modest physical activity for 10 to 60 minutes per week |
| Level 3 | participating regularly in recreation or work requiring modest physical activity for more than 60 minutes per week |
| Level 4 | participating regularly in heavy physical activity less than 1 hour per week |
| Level 5 | participating regularly in heavy physical activity for 1 - 3 hours per week |
| Level 6 | participating regularly in heavy physical activity for more than 3 hours per week |
| A series of questions to describe the participant's typical physical activity level. (See [NHANES Cardiovascular MEC Manual (cdc.gov)](https://wwwn.cdc.gov/nchs/data/nhanes/2003-2004/manuals/cv_99-04.pdf), Appendix E) | |

| **Table S2 Definition of smoking status** | |
| --- | --- |
| 12-19 years |  |
| Current smokers | Participants had smoked a full cigarette and continued smoking in the past month |
| Former smokers | Participants had smoked a full cigarette but did not smoke in the past month |
| Never smokers | Participants had not smoked a full cigarette or had never tried smoking |
| 20-49 years |  |
| Current smokers | Participants had smoked more than 100 cigarettes in their lifetime and currently smoking |
| Former smokers | Participants had smoked more than 100 cigarettes in their lifetime but not smoking recently |
| Never smokers | Participants had smoked fewer than 100 cigarettes in their lifetime |

| **Table S3** **The measurement methods of laboratory indicators** | |
| --- | --- |
| NHANES Laboratory Procedures Manual | [1999-2000 MEC Laboratory/Medical Technologists Procedures Manual (cdc.gov)](https://wwwn.cdc.gov/nchs/data/nhanes/1999-2000/manuals/1999-2000_MEC_Laboratory_Manual.pdf) |
| LDL-C | [NHANES 1999-2000: Cholesterol - LDL & Triglycerides Data Documentation, Codebook, and Frequencies (cdc.gov)](https://wwwn.cdc.gov/Nchs/Nhanes/1999-2000/LAB13AM.htm) |
| TG |
| FPG | [NHANES 1999-2000: Plasma Fasting Glucose, Serum C-peptide & Insulin Data Documentation, Codebook, and Frequencies (cdc.gov)](https://wwwn.cdc.gov/Nchs/Nhanes/1999-2000/LAB10AM.htm) |
| CRP | [NHANES 1999-2000: C-Reactive Protein (CRP) Data Documentation, Codebook, and Frequencies (cdc.gov)](https://wwwn.cdc.gov/Nchs/Nhanes/1999-2000/LAB11.htm) |
| Platelet count | [NHANES 1999-2000: Complete Blood Count with 5-part Differential - Whole Blood Data Documentation, Codebook, and Frequencies (cdc.gov)](https://wwwn.cdc.gov/Nchs/Nhanes/1999-2000/LAB25.htm) |
| Hb |
| HbA1c | [NHANES 1999-2000: Glycohemoglobin Data Documentation, Codebook, and Frequencies (cdc.gov)](https://wwwn.cdc.gov/Nchs/Nhanes/1999-2000/LAB10.htm) |
| HDL-C | [NHANES 1999-2000: Cholesterol - Total & HDL Data Documentation, Codebook, and Frequencies (cdc.gov)](https://wwwn.cdc.gov/Nchs/Nhanes/1999-2000/LAB13.htm) |

For ease of reference, detailed descriptions from the NHANES official website regarding laboratory indicator measurement methods have been compiled in the table below, using data from the 1999-2000 period as an example (
The laboratory examination methods remained consistent across the three periods: 1999-2000, 2001-2002, and 2003-2004)

| **Table S4 Comprehensive Details of the Survival Cohort Study Design for NHANES 1999-2004** | |
| --- | --- |
| Study population | The non-diabetic population participating in the cardiovascular fitness examination. Due to the unavailability of survival data for individuals under the age of 18 in NHANES, the age range for the survival cohort study is restricted to 18-49 years. |
| Exclusion Criteria | [NHANES 1999-2000: Cardiovascular Fitness Data Documentation, Codebook, and Frequencies (cdc.gov)](https://wwwn.cdc.gov/Nchs/Nhanes/1999-2000/CVX.htm" \l "Appendix_A._Classification_of_the_Exclusion_Criteria_in_the_NAHNES_Cardiovascular_Fitness_Component) |
| Definition of Mortality Outcome | We categorized all causes of death as all-cause mortality. |
| Cardiovascular mortality was defined by the International Classification of Diseases, 10th Revision (ICD-10) codes 054-064. |
| Source of Survival Data | Mortality outcomes were determined by linking the dataset to National Death Index (NDI) records up to December 31, 2019. [NCHS Data Linkage - Mortality Data - Public-Use Files (cdc.gov)](https://www.cdc.gov/nchs/data-linkage/mortality-public.htm) |
| Follow-up Status | In total, 1877 participants were enrolled for follow-up, up until December 31, 2019, with one participant lost to follow-up |
